# Supplementary material
Source: PubMed Central journal article supplement (PMC3433735)
Supplement: NIHMS49514-supplement-01.pdf [file NIHMS49514-supplement-01.pdf]

## Behavior-dependent specialization of identified hippocampal interneurons

Damien Lapray, Balint Lasztozsi, Michael Lagler, Tim James Viney, Linda Katona, Ornella Valenti, Katja Hartwich, Zsolt Borhegyi, Peter Somogyi, Thomas Klausberger

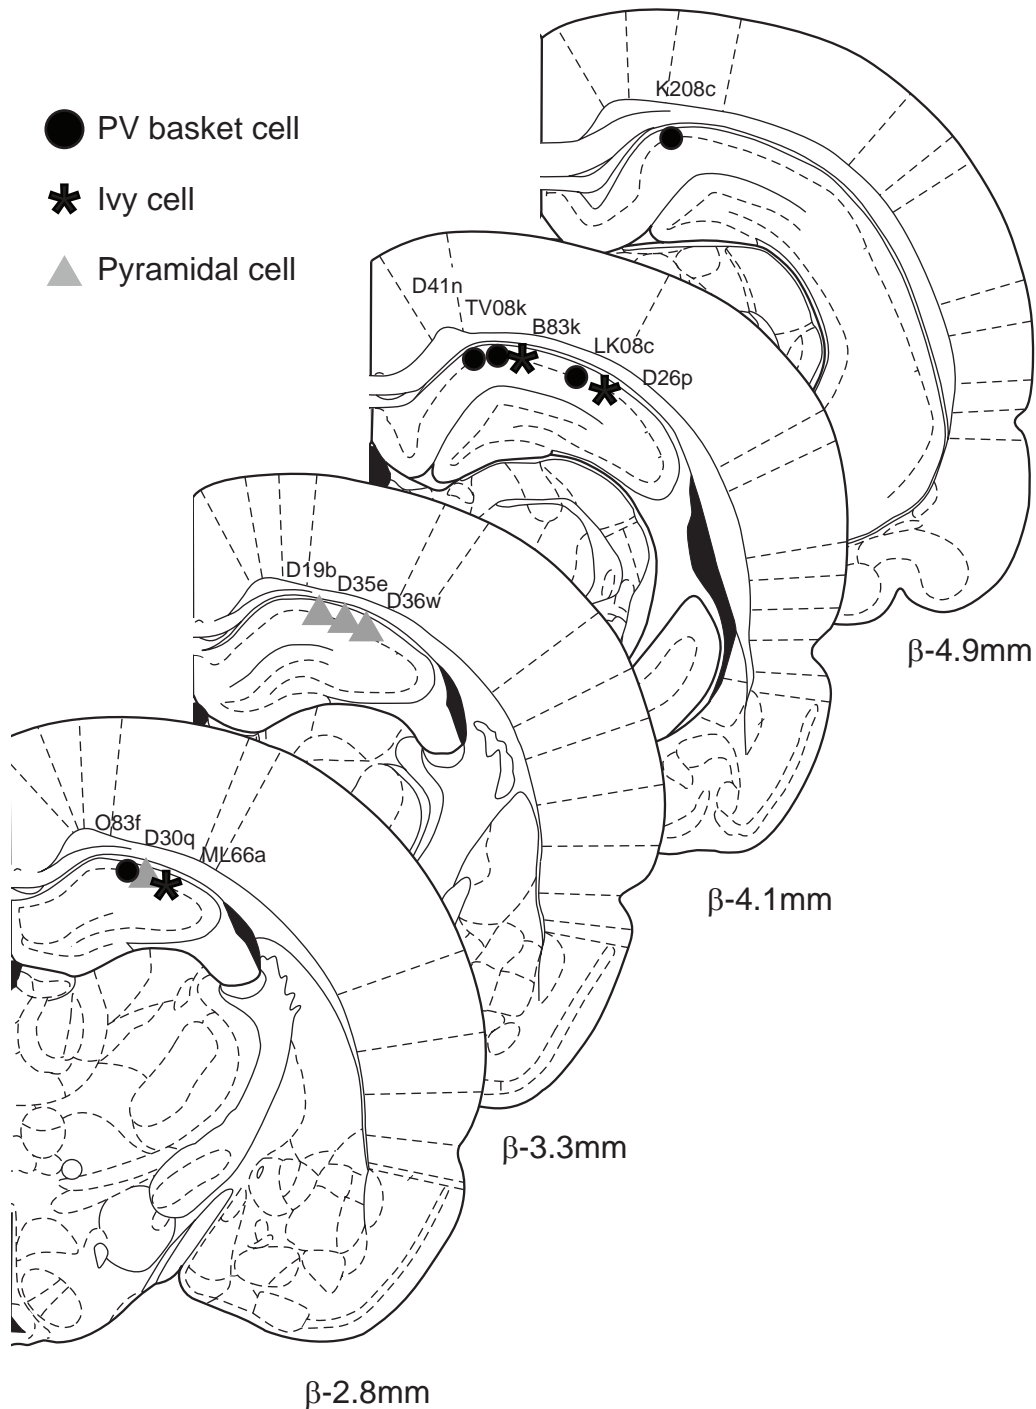

### Supplementary Figure 1. Position of recorded cells.

The positions of the recorded and labeled cells together with their individual codes are plotted in the dorsal hippocampus on schematic coronal sections based on the atlas of Paxinos and Watson, 1998.

**Supplementary Table 1. List of primary antibodies**

| molecule                  | host animal | internal ref number | dilution             | source                                                                                                                                                           | source code            | epitope, amino acid residues                                                                                                         | stock protein concentration | specificity reference                                                                                                                                                                                |
|---------------------------|-------------|---------------------|----------------------|------------------------------------------------------------------------------------------------------------------------------------------------------------------|------------------------|--------------------------------------------------------------------------------------------------------------------------------------|-----------------------------|------------------------------------------------------------------------------------------------------------------------------------------------------------------------------------------------------|
| calbindin                 | rabbit      | 989                 | 1:5000               | Swant, Bellinzona, Switzerland                                                                                                                                   | CB-38                  | raised against recombinant rat calbindin D-28k.                                                                                      | unknown                     | Airaksinen, M.S., et al. <i>Proc. Natl. Acad. Sci.</i> 94, 1488 (1997) - KO test                                                                                                                     |
| CCK                       | guinea pig  | 1306                | 1:500, 1:1000        | Dr. M. Watanabe, Hokkaido University, Japan                                                                                                                      | CCK-8                  | cysteine-tagged CCK-8 (CDYMGWMDF) coupled to keyhole limpet hemocyanin                                                               | affinity purified 380µg/ml  | labeling pattern as published with other antibodies                                                                                                                                                  |
|                           | rabbit      | 1090                | 1:500                | Dr. M. Watanabe, Hokkaido University, Japan                                                                                                                      | pro-CCK                | cysteine-tagged C-terminal 9 aa of pro-CCK (CSAEDYEYPS) coupled to keyhole limpet hemocyanin                                         | affinity purified 350µg/ml  | labeling pattern as published with other antibodies                                                                                                                                                  |
| GABAAR $\alpha$ 1 subunit | guinea pig  | 1380                | 1:200                | Prof. R. Shigemoto, Div. Cerebral Structure, Nat. Inst. Physiological Sciences, Okazaki, Japan. Purified by Prof W. Sieghart, Brain Res. Inst., Vienna, Austria. | -                      | fusion protein, mouse $\alpha$ 1 subunit, aa 328-382                                                                                 | affinity purified antibody  | Kaufmann, W.A., et al. <i>J. Comp. Neurol.</i> 515, 215 (2009); Western blot - Cell expression test                                                                                                  |
|                           | rabbit      | 946                 | 1:500, 1:1500        | Prof. W. Sieghart, Brain Res. Inst., Vienna, Austria                                                                                                             | P16                    | rat sequence, 1-9                                                                                                                    | 406µg/ml                    | Zezula, J. & Sieghart, W. <i>FEBS Lett.</i> 284, 15 (1991); Baude, A. et al. <i>Cereb. Cortex</i> 17, 2094 (2007) - KO test                                                                          |
|                           | rabbit      | 1389                | 1:250                | Prof. W. Sieghart, Brain Res. Inst., Vienna, Austria                                                                                                             | 19-8                   | rat sequence, 1-9                                                                                                                    | 272µg/ml                    | Zezula, J. & Sieghart, W. <i>FEBS Lett.</i> 284, 15 (1991); Baude, A. et al. <i>Cereb. Cortex</i> 17, 2094 (2007).                                                                                   |
| ErbB4                     | mouse       | 1353                | 1:1000, 1:500, 1:100 | Thermo Scientific                                                                                                                                                | MS-270-P0              | extracellular fragment of recombinant human c-erbB-4/HER-4 oncoprotein                                                               | 200µg/ml                    | Neddens, J., et al. <i>Biol. Psychiatry</i> 70, 636 (2011); Vullhorst, D., et al. <i>J. Neurosci.</i> 29, 12255 (2009); Chen, X., et al. <i>J. Biol. Chem.</i> 271, 7620 (1996) - KO test            |
| GABAAR $\delta$ subunit   | rabbit      | 912                 | 1:250                | Prof. W. Sieghart, Brain Res. Inst., Vienna, Austria                                                                                                             | -                      | rat sequence, aa 1-44                                                                                                                | 449µg/ml                    | Jones, A., et al. <i>J. Neurosci.</i> 17, 1350 (1997); Tretter, V., et al. <i>J. Biol. Chem.</i> 276, 10532 (2001) - KO test                                                                         |
|                           | rabbit      | 913                 | 1:250                | Prof. W. Sieghart, Brain Res. Inst., Vienna, Austria                                                                                                             | -                      | rat sequence, aa 1-44                                                                                                                | 563µg/ml                    | Jones, A., et al. <i>J. Neurosci.</i> 17, 1350 (1997); Tretter, V., et al. <i>J. Biol. Chem.</i> 276, 10532 (2001) - KO test                                                                         |
|                           | rabbit      | 1342                | 1:1000               | Prof. W. Sieghart, Brain Res. Inst., Vienna, Austria                                                                                                             | -                      | mixture of two affinity purified antibodies, rat sequences, aa 1-44 and aa 318-400                                                   | unknown                     | Jones, A., et al. <i>J. Neurosci.</i> 17, 1350 (1997).                                                                                                                                               |
| NK1R                      | guinea pig  | 991                 | 1:250                | Millipore, Chemicon, Temecula, CA, USA                                                                                                                           | AB5800                 | synthetic peptide, amino acids 393-407 from rat Substance P Receptor                                                                 | unknown                     | Le Brun, I., et al. <i>Neurosci.</i> 152, 56 (2008).                                                                                                                                                 |
|                           | rabbit      | 1301                | 1:500, 1:1000        | Millipore, Chemicon, Temecula, CA, USA                                                                                                                           | AB5060                 | synthetic peptide that corresponds to a 23 amino acid sequence (385-407) of the COOH terminus of the rat Substance P receptor (NK-1) | unknown                     | labeling pattern as published with other antibodies - Baker, S.J., et al. <i>Brain Res. Mol. Brain Res.</i> 111, 136 (2003).                                                                         |
| nNOS                      | mouse       | 1167                | 1:500, 1:1000        | Sigma                                                                                                                                                            | N2280 Lot 081K4815     | raised to recombinant rat nNOS residues 1-181.                                                                                       | ascites, 35.9 mg/ml         | labeling pattern as published with other antibodies                                                                                                                                                  |
| NPY                       | rabbit      | 587                 | 1:5000               | Peptide Institute, Osaka, Japan                                                                                                                                  | 14158-v Lot 864-410804 | NPY (human) - bovine thyroglobuline                                                                                                  | full serum                  | RIA-tised against several neuropeptides                                                                                                                                                              |
|                           | rabbit      | 1011                | 1:5000               | Diasorin (Immunostar)                                                                                                                                            | Cat No:-22940          | NPY coupled to bovine thyroglobulin (with glutaraldehyde)                                                                            | unknown                     | labeling pattern as published with other antibodies; absorption tested by manufacturer to 6 other peptides, leaving reactivity intact.                                                               |
| PV                        | goat        | 1258                | 1:1000               | Swant, Bellinzona, Switzerland                                                                                                                                   | PVG-214 Lot 3.6        | purified rat PV                                                                                                                      | unknown                     | characterized by western blot on rodent brain homogenate and labels a single band at ~12kDa (E. Celio, personal communication) (from Constantinople et al., <i>J. Comp. Neurol.</i> 516, 291 (2009)) |
|                           | guinea pig  | 1310                | 1:2000, 1:5000       | SYSY Synaptic Systems                                                                                                                                            | 195 004                | recombinant full length rat parvalbumin                                                                                              | unknown                     | labeling pattern as published with previous antibodies.                                                                                                                                              |
|                           | mouse       | 922                 | 1:5000               | Swant, Bellinzona, Switzerland                                                                                                                                   | 235 Lot 10-11 (F)      | purified carp PV                                                                                                                     | unknown                     | Celio, M.R., et al. <i>Cell Calcium</i> 9, 81 (1988).                                                                                                                                                |
|                           | rabbit      | 835                 | 1:500                | Swant, Bellinzona, Switzerland                                                                                                                                   | PV-28 Lot 5.5          | purified rat PV                                                                                                                      | unknown                     | Kagi, U., et al. <i>J. Biol. Chem.</i> 262, 7314 (1987); Schwaller, B., et al. <i>Am. J. Physiol.</i> 276, C395 (1999) - KO test                                                                     |
| reelin                    | mouse       | 1112                | 1:1000               | Chemicon                                                                                                                                                         | MAB5364 Lot LV1566698  | recombinant reelin amino acids 164-496                                                                                               | 1mg/ml                      | de Bergueck, V., et al. <i>J. Neurosci. Methods</i> 82, 17 (1998).                                                                                                                                   |
| SATB1/2                   | mouse       | 1341                | 1:100                | Abcam                                                                                                                                                            | ab51502                | recombinant fragment C-terminal (human)                                                                                              | 0.1mg/ml                    | Britanova, O., et al. <i>Neuron</i> 57, 378 (2008); Britanova, O., et al. <i>Eur. J. Neurosci.</i> 21, 658 (2005); Nielsen, J.V., et al. <i>Cereb. Cortex</i> 20, 1904 (2010).                       |
| somatostatin              | mouse       | 1276                | 1:200, 1:500         | GeneTex Incorporate                                                                                                                                              | GTX71935 cloneSOM-018  | monoclonal, somatostatin conjugated to protein carrier                                                                               | 0.14mg/ml                   | labeling pattern as published with other antibodies                                                                                                                                                  |
|                           | rat         | 815                 | 1:500                | Chemicon                                                                                                                                                         | MAB354                 | monoclonal, synthetic 1-14 cyclic somatostatin conjugated to bovine thyroglobulin using carbodiimide                                 | 1mg/ml                      | labeling pattern as published with previous antibodies - Kubota, Y., et al. <i>Cereb. Cortex</i> 21, 1803 (2011).                                                                                    |
| VIP                       | mouse       | 1053                | 1:50000              | Dr. G. Ohning, Cure, UCLA, USA                                                                                                                                   | 55                     | monoclonal, raised in mouse against VIP                                                                                              | unknown                     | Wong, H.C., et al. <i>Hybridoma</i> 15, 133 (1996).                                                                                                                                                  |
